# Supplementary material for: Differences in quantification of DNA double-strand breaks assessed by 53BP1/γH2AX focus formation assays and the comet assay in mammalian cells treated with irradiation and N-acetyl-L-cysteine
Source: PubMed Central journal article supplement — J Radiat Res. 2016 Jun 21;57(3):312–7. doi: 10.1093/jrr/rrw001 (PMC4915540; doi:10.1093/jrr/rrw001), 2016-06-21
Supplement: supp_rrw001_rrw001supp.pdf [file supp_rrw001_rrw001supp.pdf]

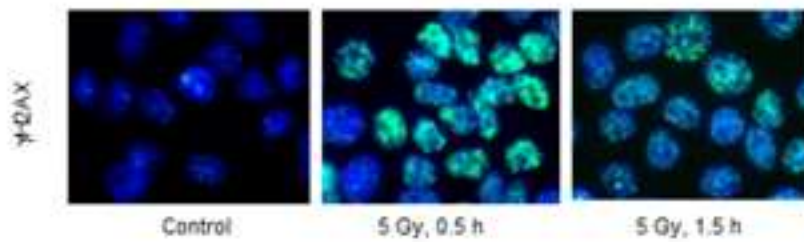

Supplementary Fig. 1. Photographs of gH2AX foci in control cells and cells 0.5 and 1.5 h after exposure to 5 Gy radiation.

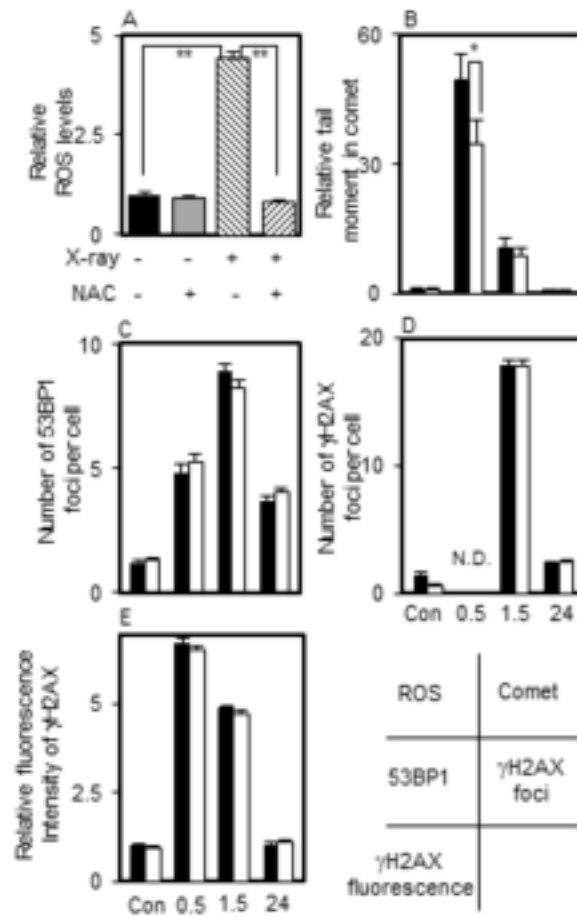

Supplementary Fig. 2. The time-course of the effect of 4 mM NAC on intracellular ROS levels (A) and DSBs determined by the neutral comet assay (B) and 53BP1/γH2AX staining (C to E) from 0.5 to 24 h after 5 Gy-irradiation. \*,  $p < 0.05$ ; \*\*,  $p < 0.01$ .

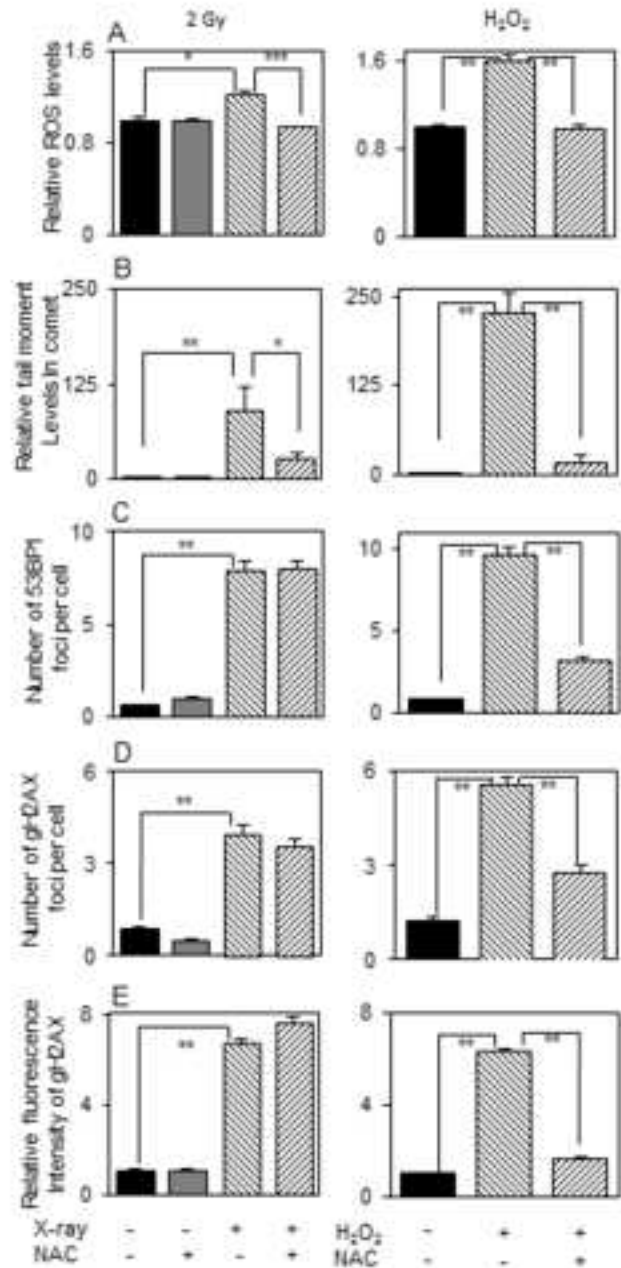

Supplementary Fig. 3. The effect of pretreatment with 20 mM NAC on irradiation-(2 Gy) or H<sub>2</sub>O<sub>2</sub>-induced intracellular ROS levels (A) and DSBs determined by the neutral comet assay (B) and 53BP1/gH2AX staining (C to E) in BJ-hTERT cells. The data were obtained 0.5 h (the comet assay and gH2AX) or 1.5 h (53BP1) after irradiation or 10 min after addition of H<sub>2</sub>O<sub>2</sub>. \*, p<0.05; \*\*, p<0.01.
